# Supplementary material
Source: PubMed Central journal article supplement (PMC1904521)
Supplement: bj4050277add.pdf [file bj4050277add.pdf]

**Supplementary Material:**

a)

|        |        |        |        |        |        |
|--------|--------|--------|--------|--------|--------|
| 814383 | 831741 | 831825 | 831846 | 831941 | 907097 |
| 814386 | 831748 | 831830 | 831847 | 831951 | 907308 |
| 831692 | 831805 | 831839 | 831850 | 832083 | 907326 |
| 831693 | 831807 | 831840 | 831853 | 832087 | 907445 |
| 831719 | 831819 | 831841 | 831855 | 832174 | 907455 |
| 831720 | 831823 | 831842 | 831860 | 832178 | 907561 |
| 831724 | 831824 | 831844 | 831884 | 834347 | UTP    |

The ChEMBL ID codes for the selected nucleotides

|                   |                                    |     |     |
|-------------------|------------------------------------|-----|-----|
| <b>TM1</b>        |                                    | 26  | 55  |
| P2Y <sub>11</sub> | FQGDFLWPIILVVEFLVAVASNGLALYRFSI    |     |     |
| P2Y <sub>1</sub>  | FQFYLLPAVYILVFIIGFLGNSVAIWMFVF     |     |     |
| P2Y <sub>2</sub>  | FKYVLLPVSYGVCVLGLCLNAVALYIFLC      |     |     |
| P2Y <sub>4</sub>  | FKFILLPVSYAVVFLGLGLNAPTLWLFIF      |     |     |
| P2Y <sub>6</sub>  | FKQLLPPVYSAVLAAGLPLNICVITQICT      |     |     |
| Rhodopsin         | WQFSMLAAYMFLIIMLGFPINFLTLTYVTVQ    |     |     |
| <b>TM2</b>        |                                    | 63  | 92  |
| P2Y <sub>11</sub> | PAVVFSVQLAVSLLCALTLPPLAAYLYPP      |     |     |
| P2Y <sub>1</sub>  | GISVYMFNLALAEFLYVLTLPALIFYYFNK     |     |     |
| P2Y <sub>2</sub>  | ASTTYMFHLAVSALYAAASLPLLVYYYARG     |     |     |
| P2Y <sub>4</sub>  | ATATYMFHLALSCTLYVLSLPTLIYYAAH      |     |     |
| P2Y <sub>6</sub>  | RTAVYTLNLALADLLYACSLPLLIYNYAQG     |     |     |
| Rhodopsin         | PLNYILLNLAVADLFMVFGGFTTLYTSLH      |     |     |
| <b>TM3</b>        |                                    | 71  | 100 |
| <b>TM3</b>        |                                    | 99  | 131 |
| P2Y <sub>11</sub> | EAAQRLEERFLFTCNLLGSIIFITCISLNIYLGI |     |     |
| P2Y <sub>1</sub>  | DAMCKLQRFIFHVNLYGSIILFLTCISAHRYSGV |     |     |
| P2Y <sub>2</sub>  | TVLCKLVRFLFYTNLYCSILFLTCISVHRCCLGV |     |     |
| P2Y <sub>4</sub>  | TEICKFVRFLFYWNLYCSVFLFLTCISVHRYLGI |     |     |
| P2Y <sub>6</sub>  | DFACRLVRFLFYANLHGSILFLTCISFQRYLGI  |     |     |
| Rhodopsin         | PTGQNLGFFATLGGEIALWLSLVLAIEIYVVV   |     |     |
| <b>TM4</b>        |                                    | 107 | 139 |
| <b>TM4</b>        |                                    | 144 | 166 |
| P2Y <sub>11</sub> | KHAWAVSAAGWVLAALLAMPTLS            |     |     |
| P2Y <sub>1</sub>  | KNAICISVLVWLVIVVAISPILF            |     |     |
| P2Y <sub>2</sub>  | RYARRVAGAVWVVLACQAPVLY             |     |     |
| P2Y <sub>4</sub>  | RLAGLLCLAVWLVVAGCLVFNLF            |     |     |
| P2Y <sub>6</sub>  | RAAWLVCAVWLVAVTTQCLPTAI            |     |     |
| Rhodopsin         | NHAIMGVAFTWVMAACAAPPLV             |     |     |
| <b>TM5</b>        |                                    | 151 | 173 |
| <b>TM5</b>        |                                    | 202 | 227 |
| P2Y <sub>11</sub> | YRAYSLVLAGLGLPGLLLTLAAVGA          |     |     |
| P2Y <sub>1</sub>  | YFIYSMCTTVAMFCVPLVLILGCYGL         |     |     |
| P2Y <sub>2</sub>  | FVAYSSVMLGLLFAVFFAVILVCAVL         |     |     |
| P2Y <sub>4</sub>  | YVHFSSAVMGLLEGVPCLVTLVCAVL         |     |     |
| P2Y <sub>6</sub>  | YMPYGMALTVIGLLPFAALLACTCL          |     |     |
| Rhodopsin         | NESFVIYMFVVFIIPLIVIFFCNGQ          |     |     |
| <b>TM6</b>        |                                    | 200 | 225 |
| <b>TM6</b>        |                                    | 243 | 269 |
| P2Y <sub>11</sub> | KLRVAALVASGVALYASSYVPEIMRV         |     |     |
| P2Y <sub>1</sub>  | RRKSIYLVIIVLTVFAVSYIPFVIMKT        |     |     |
| P2Y <sub>2</sub>  | R-KSVRTIADVLAVFALCFLEFVTRT         |     |     |
| P2Y <sub>4</sub>  | L-RSLRTIADVLTVFAVCFVPEITRT         |     |     |
| P2Y <sub>6</sub>  | RGKAARMAVVVAAAFASIFLPEITKT         |     |     |
| Rhodopsin         | EKEVTRMVIIMVIAFLICWLPYAGVAF        |     |     |
| <b>TM7</b>        |                                    | 247 | 273 |
| <b>TM7</b>        |                                    | 301 | 321 |
| P2Y <sub>11</sub> | VGVQVMRGLMPLAFCVHLLLY              |     |     |
| P2Y <sub>1</sub>  | ATVQVTRGLASLNSCVDEILY              |     |     |
| P2Y <sub>2</sub>  | MAVQVTRPLASANSCLDEVLVY             |     |     |
| P2Y <sub>4</sub>  | VVQVTRPLASANSCLDEVLVY              |     |     |
| P2Y <sub>6</sub>  | AAVQVTRPFASANSVLDLILF              |     |     |
| Rhodopsin         | IFMTIPAFFAKTSAVYNEVLY              |     |     |
| <b>TM7</b>        |                                    | 286 | 306 |

The full TM sequence alignment of *hP2Y<sub>11</sub>*-R with other *hP2Y*-R subtypes and b-rhodopsin used for modelling.

**Colour code:** green: *hP2Y*-R conserved amino acid residues; red: GPCR conserved amino acid residue.
